# 1 **Transcriptomic profiling of nematode parasites surviving after vaccine** 2 **exposure**

3

4 Guillaume Sallé<sup>1,2,\*</sup>, Roz Laing<sup>3</sup>, James A. Cotton<sup>2</sup>, Kirsty Maitland<sup>3</sup>, Axel Martinelli<sup>2#</sup>,  
5 Nancy Holroyd<sup>2</sup>, Alan Tracey<sup>2</sup>, Matthew Berriman<sup>2</sup>, W. David Smith<sup>4</sup>, George F. J.  
6 Newlands<sup>4</sup>, Eve Hanks<sup>3</sup>, Eileen Devaney<sup>3</sup>, Collette Britton<sup>3</sup>

7 <sup>1</sup>INRA - U. Tours, UMR 1282 ISP Infectiologie et Santé Publique, Centre de recherche Val  
8 de Loire, Nouzilly, France

9 <sup>2</sup>Wellcome Trust Sanger Institute, Wellcome Genome Campus, Hinxton, Cambridge, United-  
10 Kingdom

11 <sup>3</sup>Institute of Biodiversity, Animal Health and Comparative Medicine, College of Medical,  
12 Veterinary and Life Sciences, University of Glasgow, Bearsden Road, Glasgow, United-  
13 Kingdom

14 <sup>4</sup>Moredun Research Institute, Pentlands Science Park, Bush Loan, Penicuik, Midlothian,  
15 United-Kingdom

16 <sup>#</sup>Present address: Global Station for Zoonosis Control, Global Institution for Collaborative  
17 Research and Education (GI-CoRE), Hokkaido University, N20 W10 Kita-  
18 ku, Sapporo, Japan

19 \*Corresponding author

20 Email: [gs12@sanger.ac.uk](mailto:gs12@sanger.ac.uk)

21

## 22     **Abstract**

23     Some nematode species are economically important parasites of livestock, while others are  
24     important human pathogens causing some of the most important neglected tropical diseases.  
25     In both humans and animals, anthelmintic drug administration is the main control strategy,  
26     but the emergence of drug-resistant worms has stimulated the development of alternative  
27     control approaches. Among these, vaccination is considered to be a sustainable and cost  
28     effective strategy. Currently, Barbervax<sup>®</sup> for the ruminant strongylid *Haemonchus contortus*  
29     is the only registered subunit vaccine for a nematode parasite, although a vaccine for the  
30     human hookworm *Necator americanus* is undergoing clinical trials (HOOKVAC  
31     consortium). As both these vaccines comprise a limited number of proteins there is potential  
32     for selection of nematodes with altered sequence or expression of the vaccine antigens. Here  
33     we compared the transcriptome of *H. contortus* populations from sheep vaccinated with  
34     Barbervax<sup>®</sup> with worms from control animals. Barbervax<sup>®</sup> antigens are native integral  
35     membrane proteins isolated from the brush border of the intestinal cells of the adult parasite  
36     and many of them are proteases. Our findings provide no evidence for changes in expression  
37     of genes encoding Barbervax<sup>®</sup> antigens in the surviving parasite populations. However,  
38     surviving parasites from vaccinated animals showed increased expression of other proteases  
39     and regulators of lysosome trafficking, and displayed up-regulated lipid storage and  
40     defecation abilities that may have circumvented the vaccine effect. Implications for other  
41     potential vaccines for human and veterinary nematodes are discussed.

42

43

# 1. Introduction

Gastrointestinal nematodes (GIN) are clinically and economically important parasites of humans (Hotez et al., 2016) and livestock species (Kaplan and Vidyashankar, 2012). Human GIN (e.g. hookworm, roundworm and whipworm) infect over one billion people worldwide, resulting in the loss of over three million disability-adjusted life years (DALYs) in 2013 (Hotez et al., 2016). In ruminants, parasitic nematode infections cost the global livestock industry billions of dollars annually in production losses and treatments (Kaplan and Vidyashankar, 2012). GIN therefore impede both human health and wealth and are an aggravating factor of poverty (Rist et al., 2015).

Control of veterinary parasites has relied primarily on strategic drug administration (McKellar and Jackson, 2004). However the increase in anthelmintic resistance, particularly multidrug resistance, threatens the viability of the livestock industry in many regions of the world (Kaplan and Vidyashankar, 2012). Similarly, control of human helminthiasis involves large-scale community treatment, which has resulted in reductions in GIN prevalence over the last 30 years (Hotez et al., 2016; Clarke et al., 2017). However, there is also the potential for anthelmintic drug failure (Hotez et al., 2016) and recent surveys have indicated a low or variable cure rate of human hookworm infection after benzimidazole treatment, with no reduction in anaemia in some endemic regions (Keiser and Utzinger, 2008; Soukhathammavong et al., 2012).

It is unlikely that novel anthelmintic compounds will be approved at an equivalent pace to the emergence of anthelmintic resistance (Geary et al., 2004). Greater research effort is therefore being directed at vaccine development for more sustainable GIN control in both veterinary and human settings (Hewitson and Maizels, 2014; Hotez et al., 2016). Vaccines may be used alone or combined with drug treatment to reduce the emergence of drug resistance (Lee et al., 2011). In comparison to antimicrobial drugs, there are few examples of

69 the development of resistance to vaccination in bacterial or viral pathogens (Kennedy and  
70 Read, 2017). However, the antigenic complexity and immunoregulatory capacity of  
71 nematode parasites makes vaccine development challenging (Hewitson and Maizels, 2014).  
72 Only two vaccines are currently commercially available: Barbervax<sup>®</sup> licensed in Australia in  
73 2014 and comprising native parasite gut membrane glycoproteins of the ovine GIN  
74 *Haemonchus contortus* (Bassetto and Amarante, 2015; Kearney et al., 2016), and Bovilis  
75 huskvac<sup>®</sup>, an irradiated larval vaccine for the cattle lungworm *Dictyocaulus viviparus*  
76 (McKeand, 2000). For the human hookworm *Necator americanus*, a phase 1 clinical vaccine  
77 trial has been carried out using recombinant aspartic protease Na-APR-1 combined with  
78 glutathione-S-transferase-1 (Na-GST-1) (Brelsford et al., 2017).

79 Digestion of haemoglobin in haematophagous nematodes like *H. contortus* or  
80 hookworms requires activity of different proteolytic enzymes, including aspartic, cysteine  
81 and metallo-proteases and exopeptidases (Williamson et al., 2003) underscoring the large  
82 expansion of protease gene families identified within the genome of *H. contortus* (Laing et  
83 al., 2013; Schwarz et al., 2013). Barbervax<sup>®</sup> is prepared from gut membrane extracts of *H.*  
84 *contortus* adult worms and contains two major protease fractions, H11 and H-gal-GP (Smith  
85 et al., 2001). H11 is a family of microsomal aminopeptidases for which five isoforms have  
86 been identified in native extracts (Munn et al., 1997; Roberts et al., 2013), and several related  
87 isoforms recently found from genome and transcriptome analysis (Mohandas et al., 2016). H-  
88 gal-GP is a 1,000 kDa complex of four zinc metallopeptidases (MEP1-4) and two  
89 pepsinogen-like aspartyl proteases (PEP-1 and PEP-2) (Smith et al., 2003), together with  
90 additional components (thrombospondin, galectins and cystatin), thought unlikely to be  
91 protective (Knox et al., 2003). Vaccination of sheep with either H11 or H-gal-GP  
92 individually reduced worm burden and faecal egg count by 70% and 95%, respectively  
93 (Munn et al., 1997; Newton and Munn, 1999; Knox et al., 2003; LeJambre et al., 2008;

94 Roberts et al., 2013). Cysteine proteases HmCP-1,4 and 6, enriched from adult *H. contortus*  
 95 gut membrane provided a lower level of protection (Knox et al., 2005). Barbervax<sup>®</sup> induces  
 96 circulating antibodies which are ingested by the parasite when it feeds and which inhibit  
 97 haemoglobinase activity *in vitro* (Ekoja and Smith, 2010) and probably *in vivo*. Because the  
 98 gut-membrane antigens are not exposed to the host immune system during natural infection,  
 99 Barbervax<sup>®</sup> relies on the induction of antibodies to “hidden” antigens (Knox et al., 2003).  
 100 Therefore, it is speculated that the Barbervax<sup>®</sup> proteins are not under selective pressure  
 101 during natural infection, but whether vaccine-induced immunity influences levels of gene  
 102 expression is currently unknown.

103 The high level of genetic diversity observed in genomic datasets of *H. contortus*  
 104 (Laing et al., 2013) and other helminths underpins their capacity for adaptation and  
 105 contributes to the evolution of drug resistance (Gilleard and Redman, 2016). It is clear that  
 106 pathogens can evolve in response to other interventions, including vaccination, in some cases  
 107 leading to vaccine escape and failure (Brueggemann et al., 2007; Kennedy and Read, 2017).  
 108 Given the limited number of antigens composing the *H. contortus* vaccine, selection may  
 109 arise in the field. Here we compare the transcriptomes of *Haemonchus* adults surviving in  
 110 Barbervax<sup>®</sup> vaccinated animals with worms recovered from control animals post challenge  
 111 infection. Identifying any effects that vaccines may have on helminth populations may guide  
 112 their optimal use in the field.

113

## 114 **2. Materials and methods**

### 115 **2.1. Experimental design and collection of parasite material**

116 Adult worms examined in this study were collected on completion of a Barbervax<sup>®</sup> vaccine  
 117 trial carried out at the Moredun Research Institute, UK. Twelve six month old worm-free  
 118 Texel cross lambs were allocated into groups of six, balanced for sex and weight. One group

was injected subcutaneously with two doses of Barbervax<sup>®</sup> four weeks apart, whilst the second, control group was not vaccinated. All sheep were given a challenge infection of 5,000 *H. contortus* MHco3(ISE) L3 administered *per os* on the same day as the second vaccination. The MHco3(ISE) strain is susceptible to all broad-spectrum anthelmintics (Roos et al., 2004) and was inbred to produce the material for the *H. contortus* genome sequencing project at the Wellcome Trust Sanger Institute (Laing et al., 2013). All strains were maintained at the Moredun Research Institute. The same *H. contortus* MHco3(ISE) strain was used to generate the vaccine for this study and to challenge vaccinated and control lambs.

Fecal egg counts (FEC) were monitored twice weekly between days 17 and 29 post-challenge by a McMaster technique with a sensitivity of 50 eggs/g. Adult worms were recovered from each sheep at post-mortem 31 days post-challenge. Antibody titres were measured by ELISA, with plates coated with Barbervax<sup>®</sup> (50 µl per well at 2 µg/ml). Serum samples were serially diluted (from 1/100 to 1/51200) in PBS/0.5% Tween and binding detected using mouse anti-sheep IgG (Clone GT-34, Sigma G2904; 1:2500 dilution) and rabbit anti-mouse IgG-HRP conjugate (Dako P0260; 1:1000 dilution). Antibody titres are expressed as the reciprocal of the end-point dilution resulting in an OD of  $\geq 0.1$  above the average negative control value.

## 2.2. Ethics Statement

Experimental infections were performed at the Moredun Research Institute, UK as described previously (Laing et al., 2013). All experimental procedures were examined and approved by the Moredun Research Institute Experiments and Ethics Committee (MRI E46 11) and were conducted under approved UK Home Office licence (PPL 60/03899) in accordance with the 1986 Animals (Scientific Procedures) Act.

### 2.3. Extraction protocol, library preparation and sequencing

To avoid any confounding factors from eggs in females or differences in sex ratio between samples, only male worms were used for RNA sequencing. RNA sequencing was carried out on pools of seven to ten surviving *H. contortus* adult worms from each animal. In total, 54 worms that survived following challenge infection of the Barbervax vaccinated sheep (V group) and 60 worms from control sheep (C group) were picked for RNA preparations (supplementary table S1).

Total RNA was extracted from the worms using a standard Trizol (Thermo Fisher Scientific, 15596026) protocol and libraries prepared with the Illumina TruSeq RNA preparation kit before sequencing using a HiSeq 2500 platform with v3 chemistry.

### 2.4. Real-time PCR

Total RNA was extracted from triplicate samples of five female worms from the same populations as the sequenced males. 3 µg total RNA was used per oligo(dT) cDNA synthesis (SuperScript® III First-Strand Synthesis System, ThermoFisher, 18080051) with no-reverse transcriptase controls included for each sample. cDNA was diluted 1:100 for quantitative RT-PCR (RT-qPCR) and 1ul added to each reaction. RT-qPCR was carried out following the Brilliant III Ultra Fast SYBR QPCR Master Mix protocol (Agilent Technologies, 600882) and results analysed using MxPro qPCR Software, Version 4.10. Gene expression was normalised to *ama* (HCOI01464300) and *gpd* (HCOI01760600) (Lecova et al., 2015). Primer sequences are listed in Table S2.

### 2.5. Improved *H. contortus* assembly and corresponding gene model

The *H. contortus* MHco3.ISE reference genome assembly used for this study was a snapshot of the latest version as of 14/11/2014. This assembly consists of 6,668 scaffolds with a total

assembly length of 332,877,166 bp; of which 22,769,937 bp are sequence gaps. The N50 scaffold length is 5,236,391 bp and N90 length is 30,845 bp. Specifically for this project, preliminary gene models were annotated on this assembly by transferring the gene models from the published (v1.0) genome assembly (Laing et al., 2013) using RATT (Otto et al., 2011) with default parameters, and with a *de novo* approach using Augustus v2.6.1 (Stanke et al., 2004) with exon boundary 'hints' from the RNAseq data described previously (Laing et al., 2013), mapped against the new reference genome in the same way as in this previous paper.

## 2.6. RNAseq data handling and differential expression analysis

RNAseq data were mapped onto the reference genome using a gene index built with Bowtie2 (Langmead and Salzberg, 2012) and TopHat v2.1.0 (Trapnell et al., 2009) with maximal intron length of 50 Kbp and an inner mate distance of 30 bp that identified 48.8% of the reads being mapped unambiguously to a gene feature. Counts of reads spanning annotated gene features were subsequently determined with HTSeq v0.6.0 (Anders et al., 2015).

To ensure our biological conclusions are not sensitive to details of the statistical methods used, we implemented two different analysis frameworks for the RNA-seq count data, using the DESeq2 v1.12.4 framework (Love et al., 2014) and the *voom* function as implemented in the LIMMA package v3.28.21 (Law et al., 2014) in R v3.3.1 (R Core Team, 2016). Genes found to be significantly differentially expressed (DE, adjusted p-value <5%) by both VROOM and DESeq2 analyses were retained. A gene ontology enrichment analysis was performed using the TopGO package v2.26.0 (Alexa, 2016).

Gene identifiers of the vaccine core components, namely MEP-3 (Smith et al., 2000), MEP-1,2,4, PEP-1 (Britton et al., 1999) and PEP-2 (Smith et al., 2003) as well as H11, were retrieved via a BLAST search of their nucleotide sequence against the *H. contortus*



MHco3.ISE reference assembly (Laing et al., 2013) in WormBase ParaSite (Howe et al., 2016). The expression levels of candidate housekeeping genes (Lecova et al., 2015) were also retrieved using the gene identifiers associated with their GenBank records (Table 1).

### 3. Results

#### 3.1. Vaccination greatly reduces faecal egg counts in vaccinated sheep

Parasitological data confirmed a significant reduction in *H. contortus* infection following Barbervax vaccination. Over the course of the trial, vaccinated sheep (Group V) shed significantly fewer eggs (mean  $390 \pm 639$  eggs per gram faeces (epg), Fig 1A, Table S1) than the control group (Group C) given the same challenge infection dose without prior vaccination (mean  $5,914 \pm 2,628$  epg), representing a 15-fold decrease (Wilcoxon test,  $p = 0.002$ ). Vaccinated sheep contained fewer worms, indicated by the significantly lower worm volume collected at necropsy compared to control sheep ( $2.8 \text{ mL} \pm 1.9$  versus  $6.7 \text{ mL} \pm 3.5$ ; Table S1). Among the V group, V\_5 showed an outlying egg excretion over the course of the trial (1,647 epg at necropsy; upper 95% confidence interval limit of 861 epg estimated after 1,000 bootstraps), suggesting a relatively suboptimal vaccine response in this animal. This is supported by the lower antibody titre of this sheep, relative to the other Barbervax vaccinated animals, at day 28 post-challenge infection (Fig 1B).

#### 3.2. Transcriptional response of worms to host vaccination is dominated by higher expression of proteases and protease inhibitors

We investigated any changes in *H. contortus* gene expression in worms surviving in vaccinated sheep relative to those surviving in controls. On average 11M (standard deviation of 1.79M) reads were available for each library (Table S1). In PCA of the normalized RNA-seq read counts, the first two axes explained 53% of the total variation, 37% of which was

resolved along the 1<sup>st</sup> axis that separated the experimental groups (Fig S1). Two pools of worms sampled from control sheep, C\_4 and C\_6, showed atypical behaviour that was resolved along the 2<sup>nd</sup> PCA axis (Fig S1). These samples were discarded from the dataset for subsequent analyses, resulting in a comparison of 6 V samples and 4 C samples.

We found 52 genes significantly differentially expressed (DE; adjusted p-value < 0.05) between the two experimental groups, with six genes exhibiting a fold change above 4, and 34 genes showing a fold change above 2 (Figures 2 and S2, Table 1 and S3). Adult worm survival following vaccination was associated with an increase in expression of most of the DE genes, *i.e.* 46 out of 52. Among the top six DE genes, the only down-regulated gene was a glycoside hydrolase domain-containing protein (HCOI00569100, Table 1, Figure 2A). Three of the most highly up-regulated genes encoded proteins containing peptidase domains (HCOI01945600, HCOI01283800, Table 1, Figure 2A), or a peptidase inhibitor I4 domain (HCOI01549900, Table 1, Figure 2A), while two genes were unannotated (HCOI01623600, HCOI01736400). Noticeably, orthologs of HCOI01736400 in *D. viviparus* (nDv.1.0.1.g04423) or *A. caninum* (ANCCAN\_06626 and ANCCAN\_06627) also encoded cathepsin B (cysteine peptidase). Expression of the peptidases (HCOI01945600, HCOI01283800) and HCOI01736400 was validated by quantitative RT-PCR in female worms from the same population as the sequenced males, and confirmed a two to three-fold greater expression of each mRNA in worms surviving in vaccinated sheep compared to controls (Figure 2B).

Most of the top six DE genes generally exhibited low transcript counts in control C populations (Table S4), suggesting that their higher expression in worms from group V may be triggered or selected for by the vaccine exposure. Interestingly, 14 genes among the 52 DE gene set encoded peptidases or peptidase inhibitors exemplified by the significant enrichment for peptidase activity ( $p=6.7 \times 10^{-15}$ ), serine-type ( $p=9.6 \times 10^{-8}$ ) and cysteine-type peptidase

( $p=2.8 \times 10^{-10}$ ) GO terms (Table S5). This shift toward peptidase activity is also consistent with down-regulation of the gamma interferon-inducible lysosomal thiol reductase (*GILT*, HCOI02049600, Table S3), which is known to catalyse the reduction of cysteine proteases. Higher expression of two genes involved in the anti-microbial response, the Lys-8 encoding gene (HCOI00041100) associated with lysozyme formation, and the anti-microbial peptide theromacin coding gene (HCOI00456500), was also found in worms surviving in vaccinated animals. A proteinase inhibitor (HCOI01591500) and a prolyl-carboxypeptidase encoding gene (HCOI01624100) showing 99.6% similarity with contortin 2 (Genbank CAM84574.1, BLASTP, e-value=0) also showed significantly greater expression in the V group (Table S3).

### **3.3. Vaccine antigen coding genes are not differentially expressed between experimental groups**

Importantly we found that most of the genes encoding the core components of the Barbervax<sup>®</sup> vaccine (MEPs, PEPs, Aminopeptidases) were not significantly differentially expressed between V and C worms or where significant, showed slight over-expression in the V worm population (Table 1, Figure 3).

## 4. Discussion

In comparison to the development of drug resistance, vaccine resistance has rarely been reported in viruses or bacteria (Kennedy and Read, 2017). These contrasting findings may relate both to the prophylactic use of vaccines, which prevent the spread of resistant mutants among hosts, and the multiplicity of pathways targeted by the host immune response following vaccination (Kennedy and Read, 2017). However, highly diverse populations, such as *H. contortus* (Gilleard and Redman, 2016) likely encompass a wide range of genotypes that could be differentially selected, ultimately leading to vaccine resistance through replacement (Martcheva et al., 2008; Weinberger et al., 2011; Barnett et al., 2015).

Resistance to all but the newest anthelmintic drugs is common and widespread amongst gastrointestinal nematode parasites of ruminants. Barbervax<sup>®</sup>, which is specific for *H. contortus*, is the only vaccine registered for a gut dwelling nematode of any host. While this vaccine provides a useful level of protection mediated mainly by reducing pasture contamination, a small proportion of worms do survive vaccination. Here, we investigated whether the transcriptome of these survivors differed from those of control worms.

In order to generate enough genetic material for sequencing and to avoid any contamination by egg-specific transcripts, this study focused on male worms only. Consequently, our experiment could not resolve the observed sex-specific effect of the Barbervax<sup>®</sup> vaccine, *i.e.* the vaccine being more efficient on females than males (Smith and Smith, 1993), although we were able to confirm some of the observed transcriptional differences in female worms recovered from the same animals. Our data shed light on transcription modifications involved in the survival of male worms and provided insights into the mechanisms associated with their survival following vaccination.

Since both experimental groups exhibited similar levels of vaccine antigen transcripts, there was no evidence for increased expression of vaccine targets which could mediate vaccine

287 survival. However a metallopeptidase and an exopeptidase, belonging to the same functional  
 288 families (Rawlings et al., 2010) as the vaccine MEP (M13 peptidase) and H11 (M1  
 289 peptidase) respectively, were over-expressed in the vaccine survivors although it is not clear  
 290 whether these could compensate for vaccine peptidases. Instead, survival following  
 291 Barbervax<sup>®</sup> vaccination was associated with enhanced expression of a limited subset of  
 292 genes, mainly encoding cysteine peptidases. Differential tuning of a GILT-like gene, *i.e.*  
 293 down-regulated in worms surviving the vaccine response, would also support proteolytic  
 294 function as an important feature for vaccine survival, as this pleiotropic gene is known to  
 295 modulate cysteine protease activity and stability (Rausch and Hastings, 2015). In addition,  
 296 there was an indication of higher selection pressure on a *lyst-1* orthologue, a regulator of  
 297 endosomal trafficking in *C. elegans* polarized epithelial cells (de Souza et al., 2007), that may  
 298 share the same function in *H. contortus* and thus contribute to efficient processing of protein  
 299 material from the intestinal lumen. This suggests that regulation of the proteolytic pathways  
 300 in vaccine survivors may result in improved survival. While the precise function of cysteine  
 301 peptidases is hard to infer *in silico*, current knowledge from *in vitro* studies points to their  
 302 role in the proteolytic cascade responsible for degrading haemoglobin or immunoglobulin G  
 303 (Williamson et al., 2003). Perhaps worms that over-express these proteins may either  
 304 maintain blood coagulation and digestion, or are able to degrade host IgG stimulated by the  
 305 vaccine challenge (Munn et al., 1997; Ekoja and Smith, 2010) to evade the vaccine response,  
 306 or some combination of both. Indeed the vaccine is proposed to disrupt digestion in the worm  
 307 gut by blocking the function of the intestinal proteases it targets. Processing of ingested  
 308 proteins by an alternative proteolytic pathway may improve the survival and/or fecundity of  
 309 worms suffering dietary restriction. In addition, the over-expression of a myo-inositol-1  
 310 phosphate synthase in vaccine survivors may also support this theory as this gene is known to

act on lipid storage (Ashrafi et al., 2003) and in the defecation cycle (Tokuoka et al., 2008), both critical in the digestion process, and hence impacting worm growth and lifespan.

Interestingly, the most highly differentially expressed genes show a low level of expression in worms from the control group, suggesting that the vaccine response may have induced their overexpression in the vaccine survivors or alternatively, that the vaccine selects for natural variation in expression of these genes. Additional transcriptomic evaluation of the offspring of each worm subpopulation, before and after vaccine exposure, would help confirm this observation and distinguish between a regulatory response to vaccine-induced immunity and genetic differences influencing gene expression.

Whilst this study focuses on a species of veterinary significance, our findings may have relevance to other species. Indeed our results suggest that *H. contortus* may be able to compensate for vaccine-mediated immunity after vaccine exposure and a similar situation may apply in other parasitic nematode systems.

## Conclusions

Our data suggest that parasite populations surviving Barbevax<sup>®</sup> immunisation are able to optimize their proteolytic machinery, involving both peptidases and regulators of lysosome trafficking, and display better lipid storage and/or defecation abilities which may enhance survival in the face of a robust vaccine-induced immune response. While our experiment was not designed to detect genetic selection to the vaccine response, an “evolve and resequencing” approach to contrast changes in allele frequencies in vaccinated and unvaccinated populations through time, across multiple generations of vaccine challenge, could help resolve the potential for adaptation following vaccination.

## Acknowledgements

We thank Stephen Doyle for advice and comments on the manuscript and the biological services staff at MRI for their expert animal care. JAC, NH, AM, AT and MB are supported by the Wellcome Trust via their core funding of the Wellcome Trust Sanger Institute (grant 206194). JAC, NH, AT, MB, KM, RL, ED and CB are supported by BBSRC grant BB/M003949/1 (BUG), GS has received the support of the EU in the framework of the Marie-Curie FP7 COFUND People Programme, through the award of an AgreenSkills (grant agreement n° 267196) and AgreenSkills+ fellowships (grant agreement n°609398). The funders had no role in study design, data collection and analysis, decision to publish, or preparation of the manuscript.

## References

- Alexa, A., Rahnenfuhrer, J., 2016. topGO: Enrichment Analysis for Gene Ontology.
- Anders, S., Pyl, P.T., Huber, W., 2015. HTSeq--a Python framework to work with high-throughput sequencing data. *Bioinformatics* 31, 166-169.
- Ashrafi, K., Chang, F.Y., Watts, J.L., Fraser, A.G., Kamath, R.S., Ahringer, J., Ruvkun, G., 2003. Genome-wide RNAi analysis of *Caenorhabditis elegans* fat regulatory genes. *Nature* 421, 268-272.
- Barnett, T.C., Lim, J.Y., Soderholm, A.T., Rivera-Hernandez, T., West, N.P., Walker, M.J., 2015. Host-pathogen interaction during bacterial vaccination. *Curr Opin Immunol* 36, 1-7.
- Bassetto, C.C., Amarante, A.F., 2015. Vaccination of sheep and cattle against haemonchosis. *J Helminthol* 89, 517-525.
- Brelsford, J.B., Plieskatt, J.L., Yakovleva, A., Jariwala, A., Keegan, B.P., Peng, J., Xia, P., Li, G., Campbell, D., Periago, M.V., Correa-Oliveira, R., Bottazzi, M.E., Hotez, P.J., Diemert, D., Bethony, J.M., 2017. Advances in neglected tropical disease vaccines: Developing relative potency and functional assays for the Na-GST-1/Alhydrogel hookworm vaccine. *PLoS Negl Trop Dis* 11, e0005385.
- Britton, C., Redmond, D.L., Knox, D.P., McKerrow, J.H., Barry, J.D., 1999. Identification of promoter elements of parasite nematode genes in transgenic *Caenorhabditis elegans*. *Mol Biochem Parasitol* 103, 171-181.
- Brueggemann, A.B., Pai, R., Crook, D.W., Beall, B., 2007. Vaccine escape recombinants emerge after pneumococcal vaccination in the United States. *PLoS Pathog* 3, e168.
- Clarke, N.E., Clements, A.C., Doi, S.A., Wang, D., Campbell, S.J., Gray, D., Nery, S.V., 2017. Differential effect of mass deworming and targeted deworming for soil-transmitted helminth control in children: a systematic review and meta-analysis. *Lancet* 389, 287-297.
- de Souza, N., Vallier, L.G., Fares, H., Greenwald, I., 2007. SEL-2, the *C. elegans* neurobeachin/LRBA homolog, is a negative regulator of lin-12/Notch activity and affects endosomal traffic in polarized epithelial cells. *Development* 134, 691-702.

370 Ekoja, S.E., Smith, W.D., 2010. Antibodies from sheep immunized against *Haemonchus contortus*  
371 with H-gal-GP inhibit the haemoglobinase activity of this protease complex. *Parasite Immunol* 32,  
372 731-738.

373 Geary, T.G., Conder, G.A., Bishop, B., 2004. The changing landscape of antiparasitic drug discovery  
374 for veterinary medicine. *Trends Parasitol* 20, 449-455.

375 Gilleard, J.S., Redman, E., 2016. Genetic Diversity and Population Structure of *Haemonchus*  
376 *contortus*. *Adv Parasitol* 93, 31-68.

377 Hewitson, J.P., Maizels, R.M., 2014. Vaccination against helminth parasite infections. *Expert Rev*  
378 *Vaccines* 13, 473-487.

379 Hotez, P.J., Strych, U., Lustigman, S., Bottazzi, M.E., 2016. Human anthelmintic vaccines: Rationale  
380 and challenges. *Vaccine* 34, 3549-3555.

381 Howe, K.L., Bolt, B.J., Shafie, M., Kersey, P., Berriman, M., 2016. WormBase ParaSite - a  
382 comprehensive resource for helminth genomics. *Mol Biochem Parasitol*.

383 Kaplan, R.M., Vidyashankar, A.N., 2012. An inconvenient truth: Global worming and anthelmintic  
384 resistance. *Veterinary Parasitology* 186, 70-78.

385 Kearney, P.E., Murray, P.J., Hoy, J.M., Hohenhaus, M., Kotze, A., 2016. The 'Toolbox' of strategies for  
386 managing *Haemonchus contortus* in goats: What's in and what's out. *Vet Parasitol* 220, 93-107.

387 Keiser, J., Utzinger, J., 2008. Efficacy of current drugs against soil-transmitted helminth infections:  
388 systematic review and meta-analysis. *JAMA* 299, 1937-1948.

389 Kennedy, D.A., Read, A.F., 2017. Why does drug resistance readily evolve but vaccine resistance does  
390 not? *Proc Biol Sci* 284.

391 Knox, D.P., Redmond, D.L., Newlands, G.F., Skuce, P.J., Pettit, D., Smith, W.D., 2003. The nature and  
392 prospects for gut membrane proteins as vaccine candidates for *Haemonchus contortus* and other  
393 ruminant trichostrongyloids. *Int J Parasitol* 33, 1129-1137.

394 Knox, D.P., Smith, S.K., Redmond, D.L., Smith, W.D., 2005. Protection induced by vaccinating sheep  
395 with a thiol-binding extract of *Haemonchus contortus* membranes is associated with its protease  
396 components. *Parasite Immunol* 27, 121-126.

397 Laing, R., Kikuchi, T., Martinelli, A., Tsai, I.J., Beech, R.N., Redman, E., Holroyd, N., Bartley, D.J.,  
398 Beasley, H., Britton, C., Curran, D., Devaney, E., Gilabert, A., Hunt, M., Jackson, F., Johnston, S.L.,  
399 Kryukov, I., Li, K., Morrison, A.A., Reid, A.J., Sargison, N., Saunders, G.I., Wasmuth, J.D.,  
400 Wolstenholme, A., Berriman, M., Gilleard, J.S., Cotton, J.A., 2013. The genome and transcriptome of  
401 *Haemonchus contortus*, a key model parasite for drug and vaccine discovery. *Genome Biol* 14, R88.

402 Langmead, B., Salzberg, S.L., 2012. Fast gapped-read alignment with Bowtie 2. *Nat Methods* 9, 357-  
403 359.

404 Law, C.W., Chen, Y., Shi, W., Smyth, G.K., 2014. voom: Precision weights unlock linear model analysis  
405 tools for RNA-seq read counts. *Genome Biol* 15, R29.

406 Lecova, L., Ruzickova, M., Laing, R., Vogel, H., Szotakova, B., Prchal, L., Lamka, J., Vokral, I., Skalova,  
407 L., Matouskova, P., 2015. Reliable reference gene selection for quantitative real time PCR in  
408 *Haemonchus contortus*. *Mol Biochem Parasitol* 201, 123-127.

409 Lee, B.Y., Bacon, K.M., Bailey, R., Wiringa, A.E., Smith, K.J., 2011. The potential economic value of a  
410 hookworm vaccine. *Vaccine* 29, 1201-1210.

411 LeJambre, L.F., Windon, R.G., Smith, W.D., 2008. Vaccination against *Haemonchus contortus*:  
412 performance of native parasite gut membrane glycoproteins in Merino lambs grazing contaminated  
413 pasture. *Vet Parasitol* 153, 302-312.

414 Love, M.I., Huber, W., Anders, S., 2014. Moderated estimation of fold change and dispersion for  
415 RNA-seq data with DESeq2. *Genome Biol* 15, 550.

416 Martcheva, M., Bolker, B.M., Holt, R.D., 2008. Vaccine-induced pathogen strain replacement: what  
417 are the mechanisms? *J R Soc Interface* 5, 3-13.

418 McKeand, J.B., 2000. Vaccine development and diagnostics of *Dictyocaulus viviparus*. *Parasitology*  
419 120 Suppl, S17-23.



McKellar, Q.A., Jackson, F., 2004. Veterinary anthelmintics: old and new. *Trends Parasitol* 20, 456-461.

Mohandas, N., Young, N.D., Jabbar, A., Korhonen, P.K., Koehler, A.V., Hall, R.S., Hu, M., Hofmann, A., Gasser, R.B., 2016. The complement of family M1 aminopeptidases of *Haemonchus contortus*--Biotechnological implications. *Biotechnol Adv* 34, 65-76.

Munn, E.A., Smith, T.S., Smith, H., James, F.M., Smith, F.C., Andrews, S.J., 1997. Vaccination against *Haemonchus contortus* with denatured forms of the protective antigen H11. *Parasite Immunol* 19, 243-248.

Newton, S.E., Munn, E.A., 1999. The development of vaccines against gastrointestinal nematode parasites, particularly *Haemonchus contortus*. *Parasitol Today* 15, 116-122.

Otto, T.D., Dillon, G.P., Degraeve, W.S., Berriman, M., 2011. RATT: Rapid Annotation Transfer Tool. *Nucleic Acids Res* 39, e57.

R Core Team, 2016. R: A Language and Environment for Statistical Computing. R Foundation for Statistical Computing, Vienna.

Rausch, M.P., Hastings, K.T., 2015. Diverse cellular and organismal functions of the lysosomal thiol reductase GILT. *Mol Immunol* 68, 124-128.

Rawlings, N.D., Barrett, A.J., Bateman, A., 2010. MEROPS: the peptidase database. *Nucleic Acids Res* 38, D227-233.

Rist, C.L., Garchitorena, A., Ngonghala, C.N., Gillespie, T.R., Bonds, M.H., 2015. The Burden of Livestock Parasites on the Poor. *Trends Parasitol* 31, 527-530.

Roberts, B., Antonopoulos, A., Haslam, S.M., Dicker, A.J., McNeilly, T.N., Johnston, S.L., Dell, A., Knox, D.P., Britton, C., 2013. Novel expression of *Haemonchus contortus* vaccine candidate aminopeptidase H11 using the free-living nematode *Caenorhabditis elegans*. *Vet Res* 44, 111.

Roos, M.H., Otsen, M., Hoekstra, R., Veenstra, J.G., Lenstra, J.A., 2004. Genetic analysis of inbreeding of two strains of the parasitic nematode *Haemonchus contortus*. *Int J Parasitol* 34, 109-115.

Schwarz, E.M., Korhonen, P.K., Campbell, B.E., Young, N.D., Jex, A.R., Jabbar, A., Hall, R.S., Mondal, A., Howe, A.C., Pell, J., Hofmann, A., Boag, P.R., Zhu, X.Q., Gregory, T., Loukas, A., Williams, B.A., Antoshechkin, I., Brown, C., Sternberg, P.W., Gasser, R.B., 2013. The genome and developmental transcriptome of the strongylid nematode *Haemonchus contortus*. *Genome Biol* 14, R89.

Smith, W.D., Pettit, D., Smith, S.K., 2001. Cross-protection studies with gut membrane glycoprotein antigens from *Haemonchus contortus* and *Teladorsagia circumcincta*. *Parasite Immunology* 23, 203-211.

Smith, W.D., Skuce, P.J., Newlands, G.F., Smith, S.K., Pettit, D., 2003. Aspartyl proteases from the intestinal brush border of *Haemonchus contortus* as protective antigens for sheep. *Parasite Immunol* 25, 521-530.

Smith, W.D., Smith, S.K., 1993. Evaluation of aspects of the protection afforded to sheep immunised with a gut membrane protein of *Haemonchus contortus*. *Res Vet Sci* 55, 1-9.

Smith, W.D., Smith, S.K., Pettit, D., Newlands, G.F., Skuce, P.J., 2000. Relative protective properties of three membrane glycoprotein fractions from *Haemonchus contortus*. *Parasite Immunol* 22, 63-71.

Soukhathammavong, P.A., Sayasone, S., Phongluxa, K., Xayaseng, V., Utzinger, J., Vounatsou, P., Hatz, C., Akkhavong, K., Keiser, J., Odermatt, P., 2012. Low efficacy of single-dose albendazole and mebendazole against hookworm and effect on concomitant helminth infection in Lao PDR. *PLoS Negl Trop Dis* 6, e1417.

Stanke, M., Steinkamp, R., Waack, S., Morgenstern, B., 2004. AUGUSTUS: a web server for gene finding in eukaryotes. *Nucleic Acids Res* 32, W309-312.

Tokuoka, S.M., Saiardi, A., Nurrish, S.J., 2008. The mood stabilizer valproate inhibits both inositol- and diacylglycerol-signaling pathways in *Caenorhabditis elegans*. *Mol Biol Cell* 19, 2241-2250.

Trapnell, C., Pachter, L., Salzberg, S.L., 2009. TopHat: discovering splice junctions with RNA-Seq. *Bioinformatics* 25, 1105-1111.

Weinberger, D.M., Malley, R., Lipsitch, M., 2011. Serotype replacement in disease after pneumococcal vaccination. *Lancet* 378, 1962-1973.

Williamson, A.L., Brindley, P.J., Knox, D.P., Hotez, P.J., Loukas, A., 2003. Digestive proteases of blood-feeding nematodes. *Trends Parasitol* 19, 417-423.

# **Figure 1. Faecal egg counts and anti-Barbervax IgG titer of individual sheep**

Fig 1A Faecal egg counts from each of the 12 sheep in the trial were plotted for each available time point post challenge. The plot shows a 15-fold difference in egg excretion between vaccinated and control sheep on day 29 post challenge infection. Dots for V\_1, V\_3 and V\_4 overlap around 0 as a result of low counts.

Fig 1B Faecal egg count measured at necropsy plotted against respective anti-Barbervax<sup>®</sup> vaccine IgG titer, showing a negative correlation between vaccine response and egg count.

# **Figure 2. Expression level of the top differentially expressed genes within each experimental group (2A) and associated correlation with faecal egg count in control populations (2B)**

A. A boxplot for all six genes that exhibited an absolute log-transformed fold change of 2 between the experimental conditions. Dcp stands for “Domain Containing Protein”.

B. Fold change in expression level of selected genes, by qRT-PCR, shown relative to C control population. qRT-PCR was carried out on RNA extracted from adult female worms. HCOI01283800: Peptidase C1A domain containing protein; HCOI01549900: Protease inhibitor I4 domain containing protein; HCOI01736400: ortholog to cathepsin B in *D. viviparus* and *A. caninum*.

# **Figure 3. Expression level for the vaccine antigen coding genes**

Figure 3 shows the normalized transcript counts for known vaccine antigen coding genes. Each dot stands for the transcript count measured in a pool of worms from vaccinated (V, green dots) or control (C, red dots) sheep. Some of the dots overlap because of similar expression levels.

497

498

499 **Table 1. Gene of interest expression levels, fold change and associated p-values**

|                              | Gene ID      | Mean count <sup>a</sup> | logFC <sup>b</sup><br>DESeq2 | adj. P <sup>c</sup><br>DESeq2 | logFC <sup>b</sup><br>VOOM | adj. P <sup>c</sup><br>VOOM | Correlation with<br>FEC29 <sup>d</sup> | WormBase ParaSite Gene description                                                                                | <i>C. elegans</i><br>orthologue | Candidate<br>Gene Name | Genbank Acc.<br>Number |
|------------------------------|--------------|-------------------------|------------------------------|-------------------------------|----------------------------|-----------------------------|----------------------------------------|-------------------------------------------------------------------------------------------------------------------|---------------------------------|------------------------|------------------------|
| Top differentially expressed | HCOI00569100 | 24.21                   | -2.39                        | <b>2.40E-13</b>               | -5.16                      | <b>4.55E-03</b>             | 0.63 (0.05)                            | Glycoside hydrolase domain containing protein [U6P060]                                                            | n/a                             | n/a                    | n/a                    |
|                              | HCOI01945600 | 2000.03                 | 2.02                         | <b>2.33E-16</b>               | 2.39                       | <b>9.83E-04</b>             | -0.64 (0.05)                           | Peptidase A1 domain containing protein [U6PP66]                                                                   | pcl, Bace                       | n/a                    | n/a                    |
|                              | HCOI01623600 | 23.12                   | 2.03                         | <b>2.05E-09</b>               | 4.21                       | <b>6.77E-03</b>             | -0.79 (0.01)                           | n/a                                                                                                               | n/a                             | n/a                    | n/a                    |
|                              | HCOI01283800 | 38840.11                | 2.15                         | <b>3.58E-15</b>               | 2.79                       | <b>1.28E-03</b>             | -0.76 (0.01)                           | Peptidase C1A domain containing protein [U6P6R9]                                                                  | CtsB1                           | n/a                    | n/a                    |
|                              | HCOI01549900 | 1104.78                 | 2.20                         | <b>6.42E-16</b>               | 2.86                       | <b>1.31E-03</b>             | -0.73 (0.02)                           | Protease inhibitor I4 domain containing protein [U6PNP0]                                                          | srp-1,2,3,6,7,8                 | n/a                    | n/a                    |
|                              | HCOI01736400 | 2678.92                 | 2.49                         | <b>4.60E-31</b>               | 3.01                       | <b>7.91E-05</b>             | -0.81 (0.004)                          | n/a                                                                                                               | CtsB1                           | n/a                    | n/a                    |
| Vaccine Antigen              | HCOI01993300 | 4049.71                 | 0.30                         | 3.09E-01                      | 0.32                       | 3.46E-01                    | n/a                                    | Propeptide domain containing protein [U6PXI5]                                                                     | n/a                             | pep-2                  | AJ577754.1             |
|                              | HCOI01993500 | 13499.65                | 0.34                         | 2.65E-01                      | 0.35                       | 3.06E-01                    | n/a                                    | Propeptide and Peptidase A1 domain containing protein [U6PQD5]                                                    | n/a                             | pep-1                  | AF079402.1             |
|                              | HCOI00348800 | 8859.39                 | 0.47                         | <b>1.56E-02</b>               | 0.51                       | 1.14E-01                    | n/a                                    | Peptidase M13 domain containing protein [U6NMI3]                                                                  | n/a                             | mep-2                  | AF080117.1             |
|                              | HCOI01333400 | 9325.90                 | 0.59                         | <b>3.88E-02</b>               | 0.62                       | 1.64E-01                    | n/a                                    | Peptidase M13 domain containing protein [U6PHP6]                                                                  | nep-9, nep-20                   | mep-3                  | AF080172.1             |
|                              | HCOI02032800 | 2207.13                 | 0.71                         | <b>1.25E-02</b>               | 0.90                       | 5.97E-02                    | n/a                                    | Peptidase M1 domain containing protein [U6PYE0]                                                                   | T07F10.1                        | h11                    | FJ481146.1             |
|                              | HCOI00308300 | 18250.90                | 0.73                         | <b>4.82E-04</b>               | 0.78                       | 5.85E-02                    | n/a                                    | Peptidase M13 domain containing protein [U6NME0]                                                                  |                                 | mep-1                  | AF102130.1             |
|                              | HCOI00631000 | 5690.45                 | 0.77                         | <b>2.40E-04</b>               | 0.81                       | 5.97E-02                    | n/a                                    |                                                                                                                   |                                 | mep-4                  | AF132519.1             |
| Housekeeping genes           | HCOI00909100 | 5753.25                 | -0.41                        | 5.29E-01                      | -0.60                      | 3.93E-01                    | n/a                                    | Nematode fatty acid retinoid binding domain containing protein [U6NYW0]                                           | n/a                             | far                    | CDJ86885.1             |
|                              | HCOI00117100 | 1379.12                 | 0.08                         | 9.64E-01                      | 0.07                       | 7.96E-01                    | n/a                                    | Superoxide dismutase [Cu-Zn] [U6NGP5]                                                                             | n/a                             | sod                    | CDJ80830.1             |
|                              | HCOI01760600 | 24868.64                | 0.08                         | 8.59E-01                      | 0.08                       | 7.92E-01                    | n/a                                    | Glyceraldehyde-3-phosphate dehydrogenase (inferred by orthology to a human protein) [Source:UniProtKB;Acc:P04406] | n/a                             | gpd                    | CDJ92718.1             |
|                              | HCOI01743600 | 194.02                  | 0.13                         | 9.13E-01                      | 0.14                       | 7.28E-01                    | n/a                                    | RNA recognition motif domain containing protein [U6NLP1]                                                          | n/a                             | ncbp                   | CDJ82645.1             |
|                              | HCOI01464300 | 974.31                  | 0.32                         | 3.24E-01                      | 0.35                       | 3.06E-01                    | n/a                                    | DNA-directed RNA polymerase [U6PFA6]                                                                              | n/a                             | ama                    | CDJ91461.1             |

500 <sup>a</sup>:Mean count indicates the mean transcript count across the pools; <sup>b</sup>:log-Fold Change in expression as measured by DeSeq2 or Voom accordingly stands ; <sup>c</sup>: p-values  
501 adjusted for multiple testing; <sup>d</sup>: correlation between transcript expression level and Faecal Egg Count at 29 day post-infection.

## Supporting information

### **Supplementary Figure1. Principal component analysis (PCA) of transcript counts measured in worms collected in vaccinated or control sheep**

PCA is a dimensionality reduction method that makes use of transcript counts to define a new set of unrelated components. Coordinates of every pool of worms considered for analysis is plotted against first two components and correlate with similarities between pools. The first PCA axis explains 36% of total variance and relates to differences between the two considered experimental groups, *i.e.* worms exposed to the vaccine response (V) or the control group (C).

### **Supplementary Figure2. Number of differentially expressed genes found by each of the two implemented methods**

Total number of significantly differentially expressed genes found by at least one of the two methods (DESeq2, VOOM, or both (intersecting)) are plotted according to their regulation pattern, *i.e.* up or down-regulated in the vaccine survivors, to their estimated fold change, *i.e.*  $\log_2FC > 2$ , 1 or 0.

### **Supplementary Table 1. Faecal egg count and worm volumes recovered at necropsy and RNA-seq library details**

### **Supplementary Table 2. List of primer sequences used for qPCR validation**

### **Supplementary Table 3. Complete list of differentially expressed genes**

### **Supplementary Table 4. Transcript count of the six most differentially expressed genes in pools of male worms from each sheep**

### **Supplementary Table 5. Significantly enriched GO terms associated with the differentially expressed genes**



A

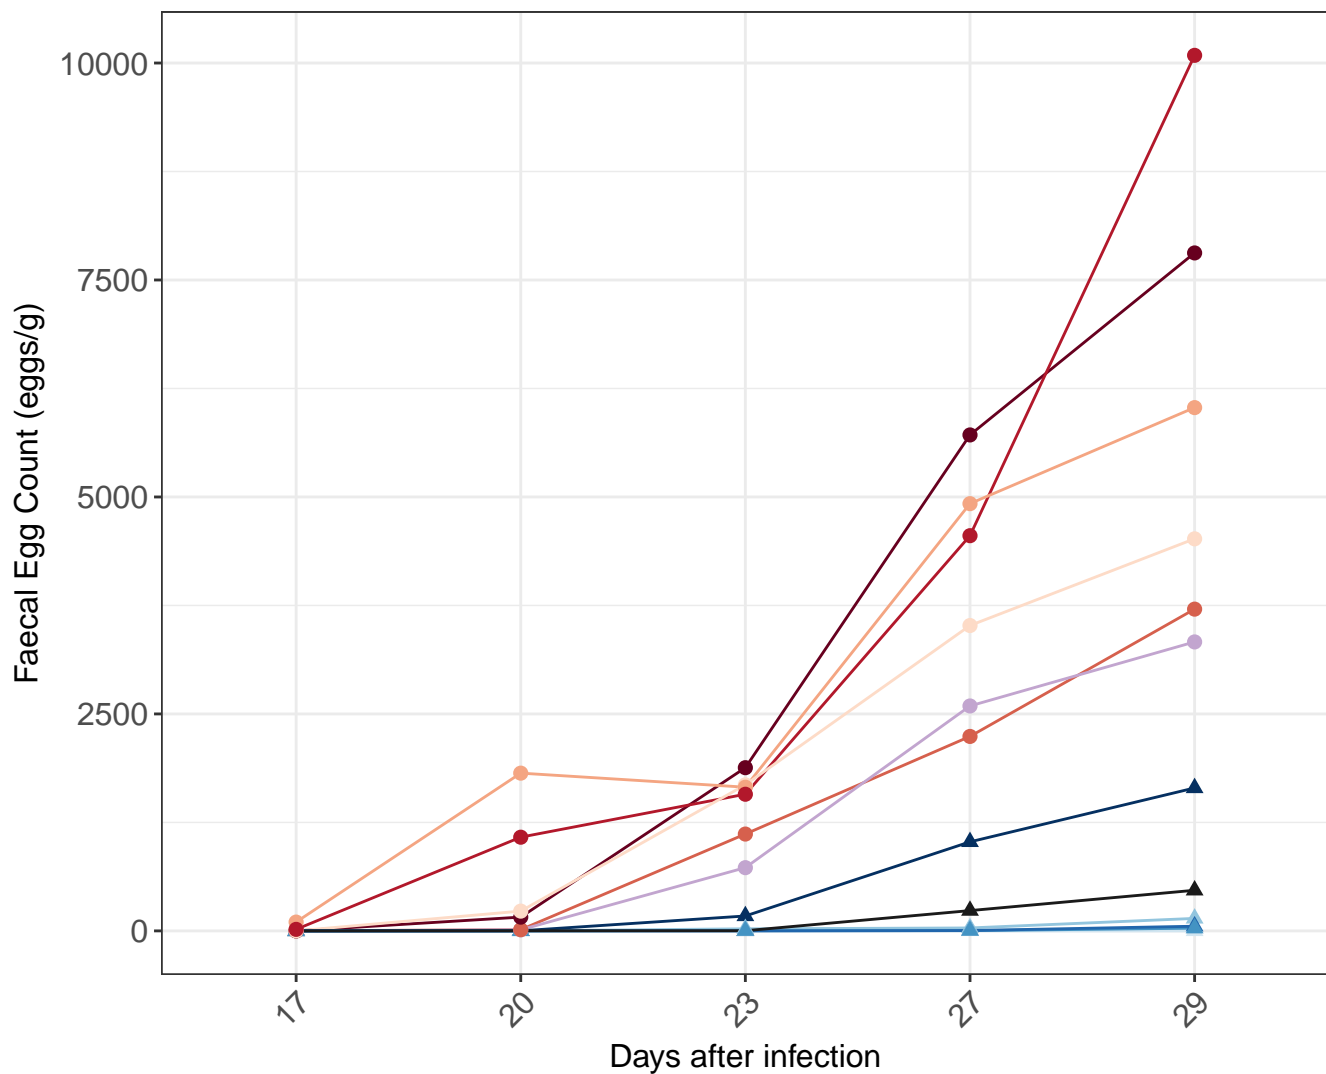



**B**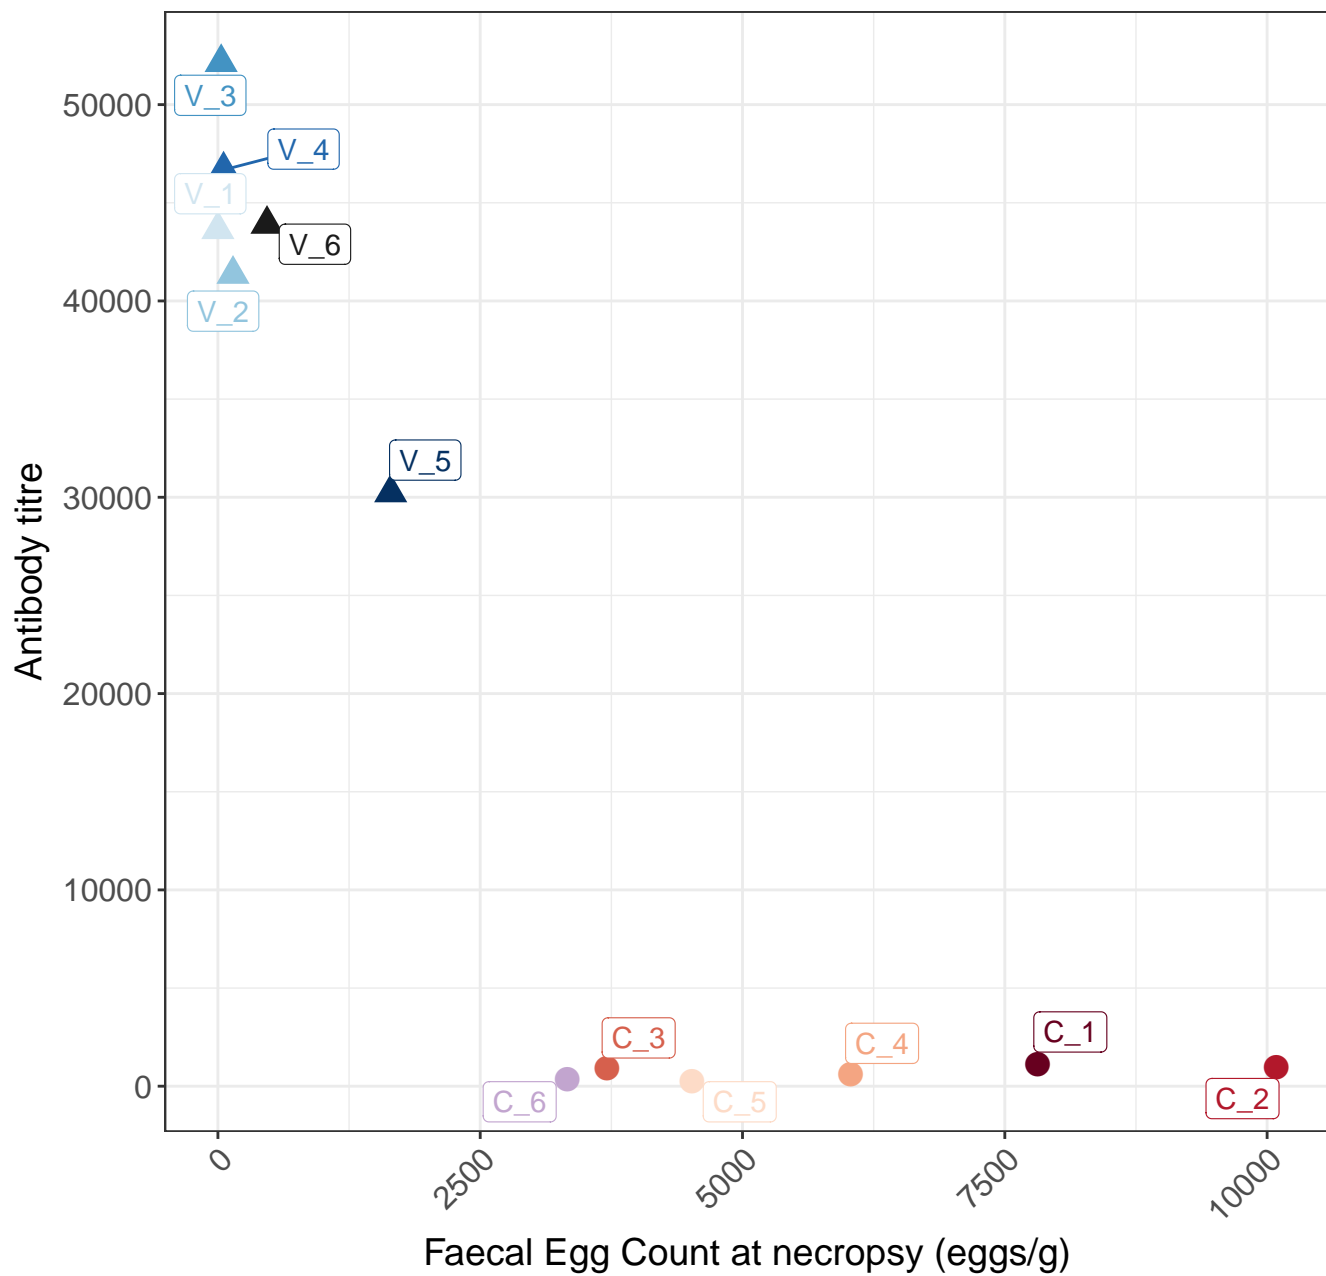

A

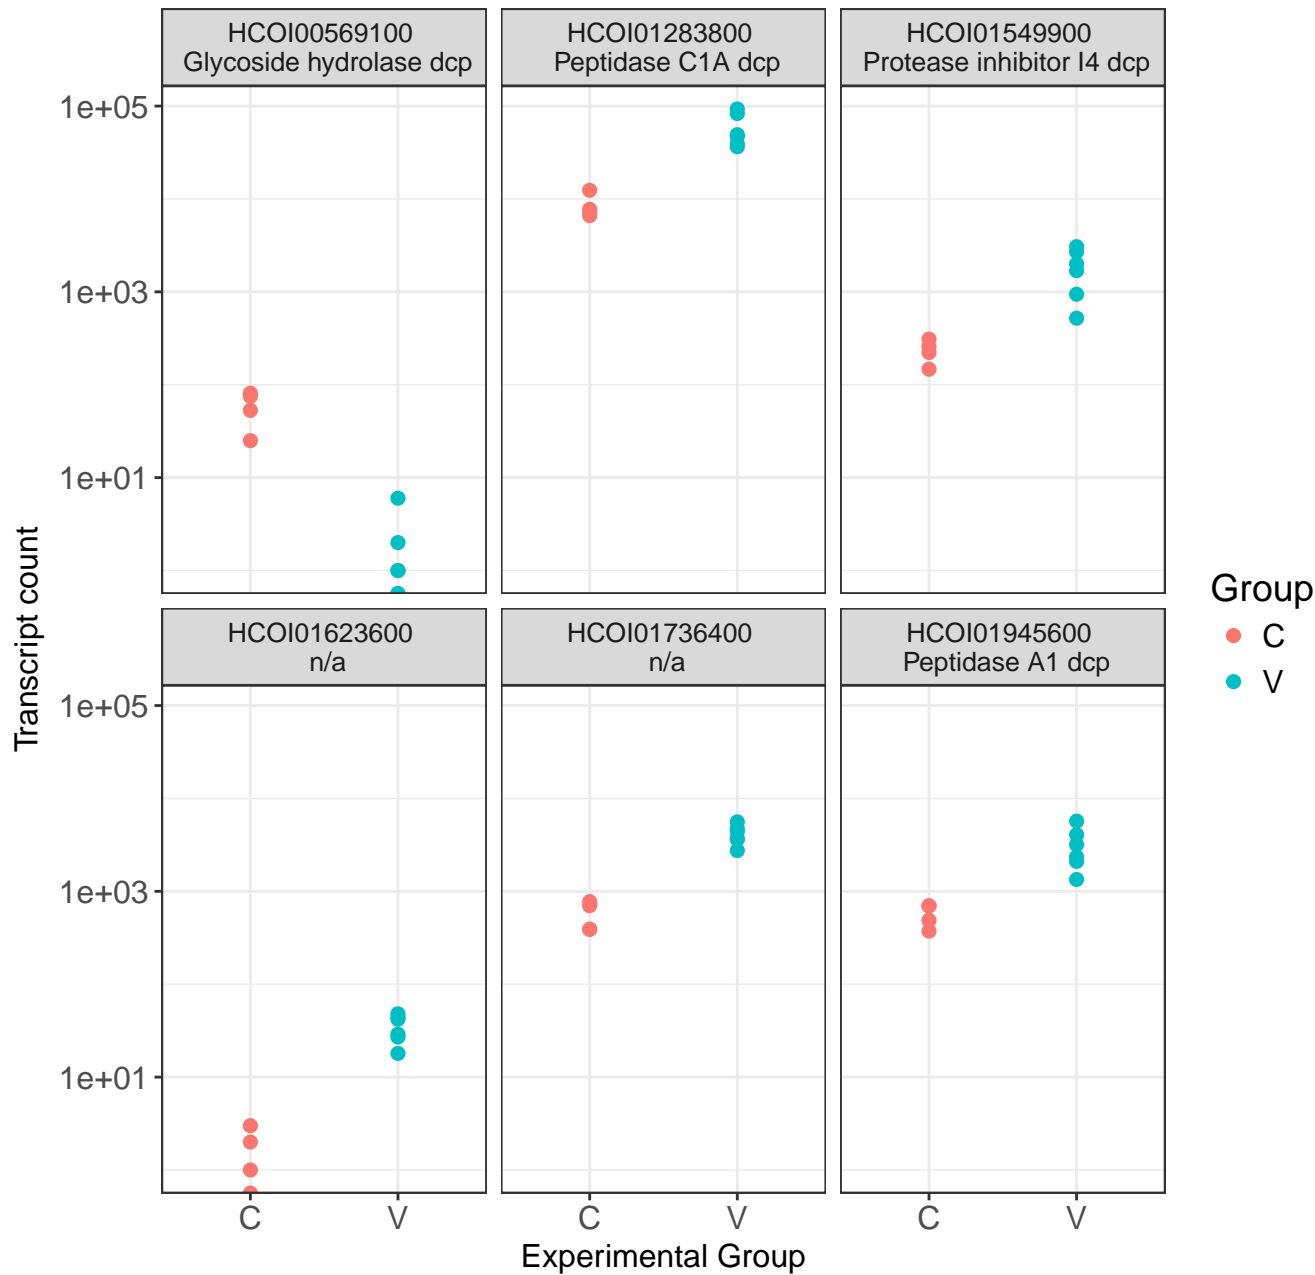

**B**Expression fold change  
relative to the control population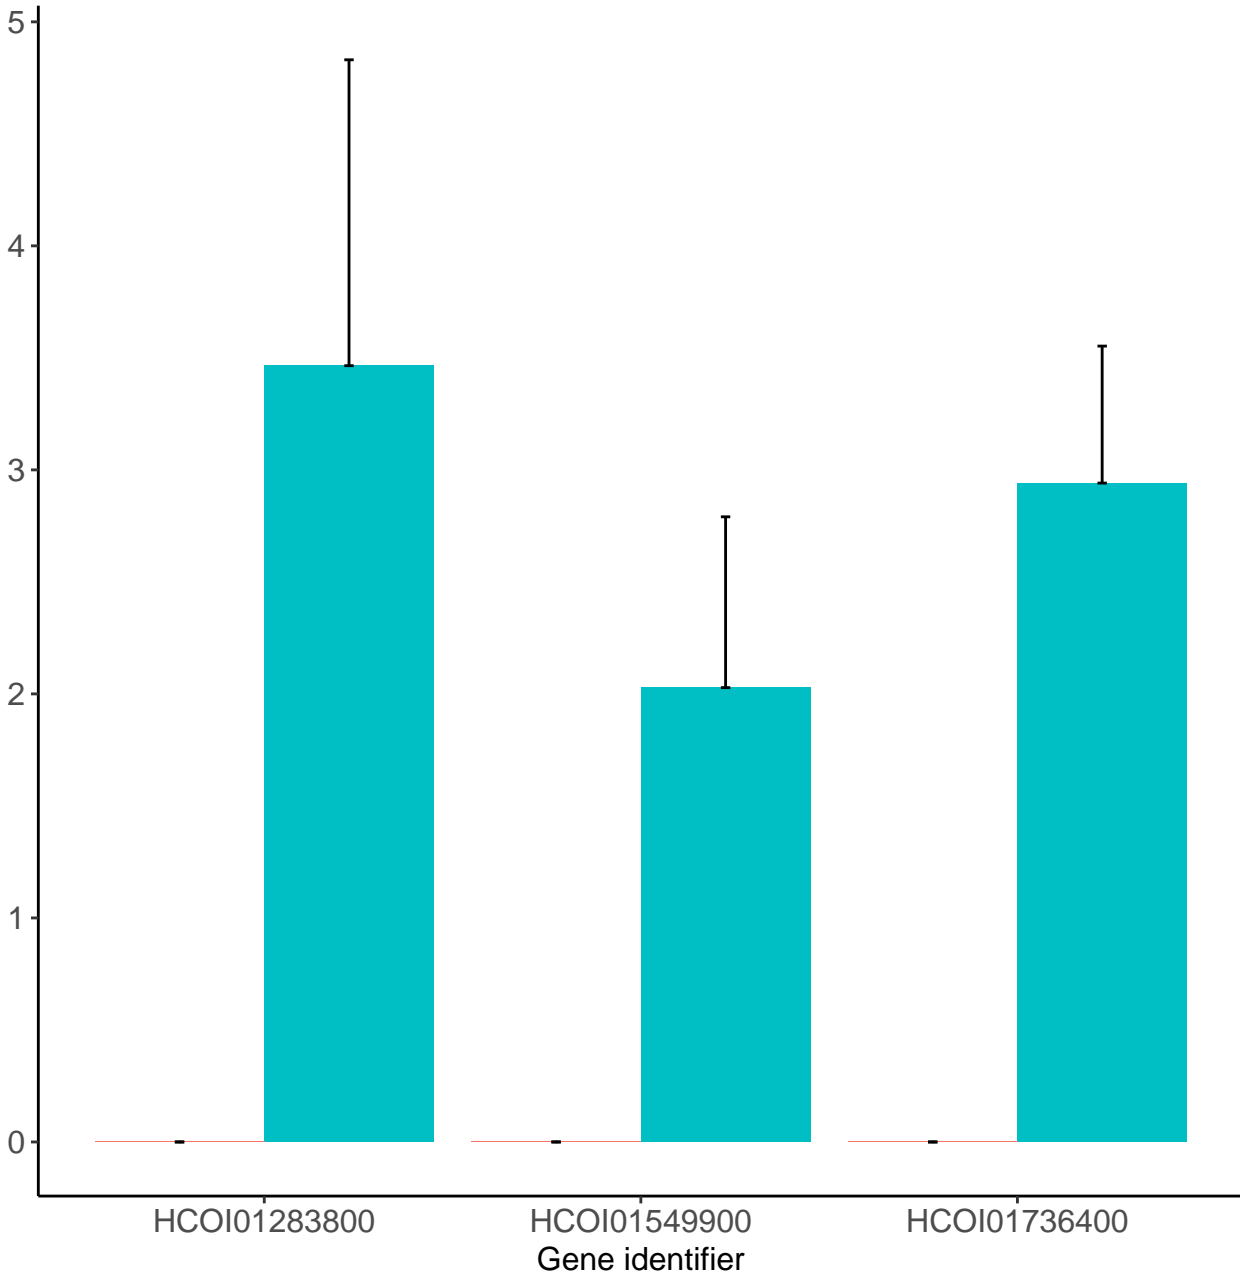

Transcript count

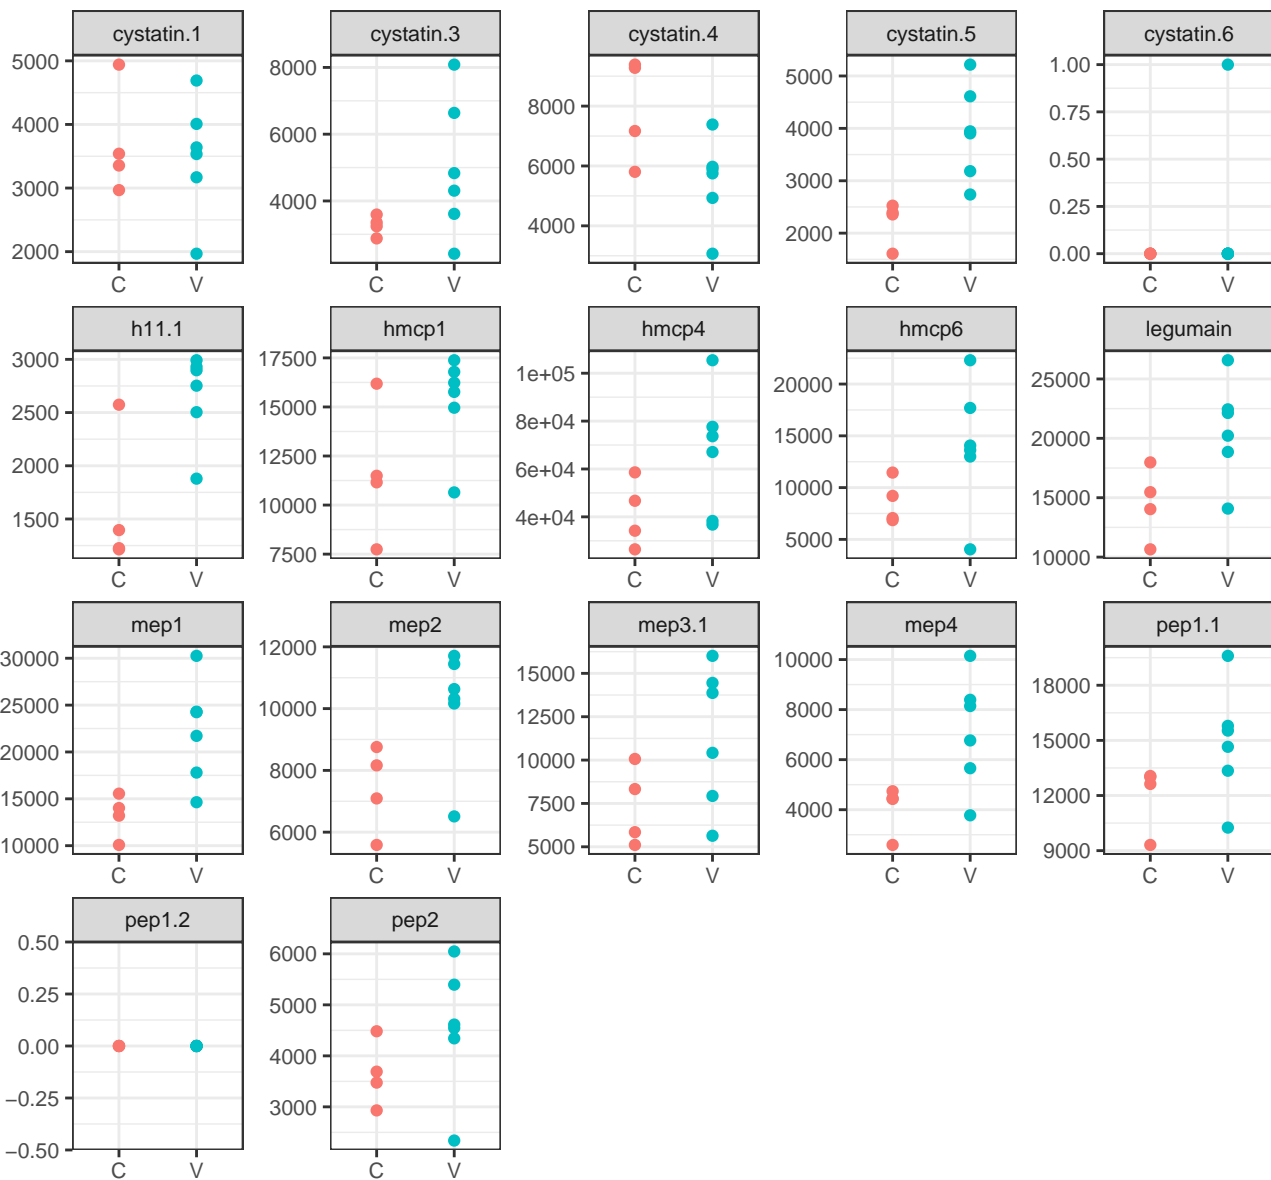

Experimental Group

Group ● C ● V
